# Supplementary material for: EMAPII Monoclonal Antibody Ameliorates Influenza A Virus-Induced Lung Injury
Source: PubMed Central journal article supplement — Mol Ther. 2018 Jun 15;26(8):2060–9. doi: 10.1016/j.ymthe.2018.05.017 (PMC6094359; doi:10.1016/j.ymthe.2018.05.017), 2018-06-15
Supplement: mmc1.pdf [file mmc1.pdf]

**YMTHE, Volume 26**

**Supplemental Information**

**EMAPII Monoclonal Antibody Ameliorates**

**Influenza A Virus-Induced Lung Injury**

**Hongyan Lu, Sarvesh Chelvanambi, Christophe Poirier, Jacob Saliba, Keith L. March, Matthias Clauss, and Natalia V. Bogatcheva**

## Supplemental Figure 1

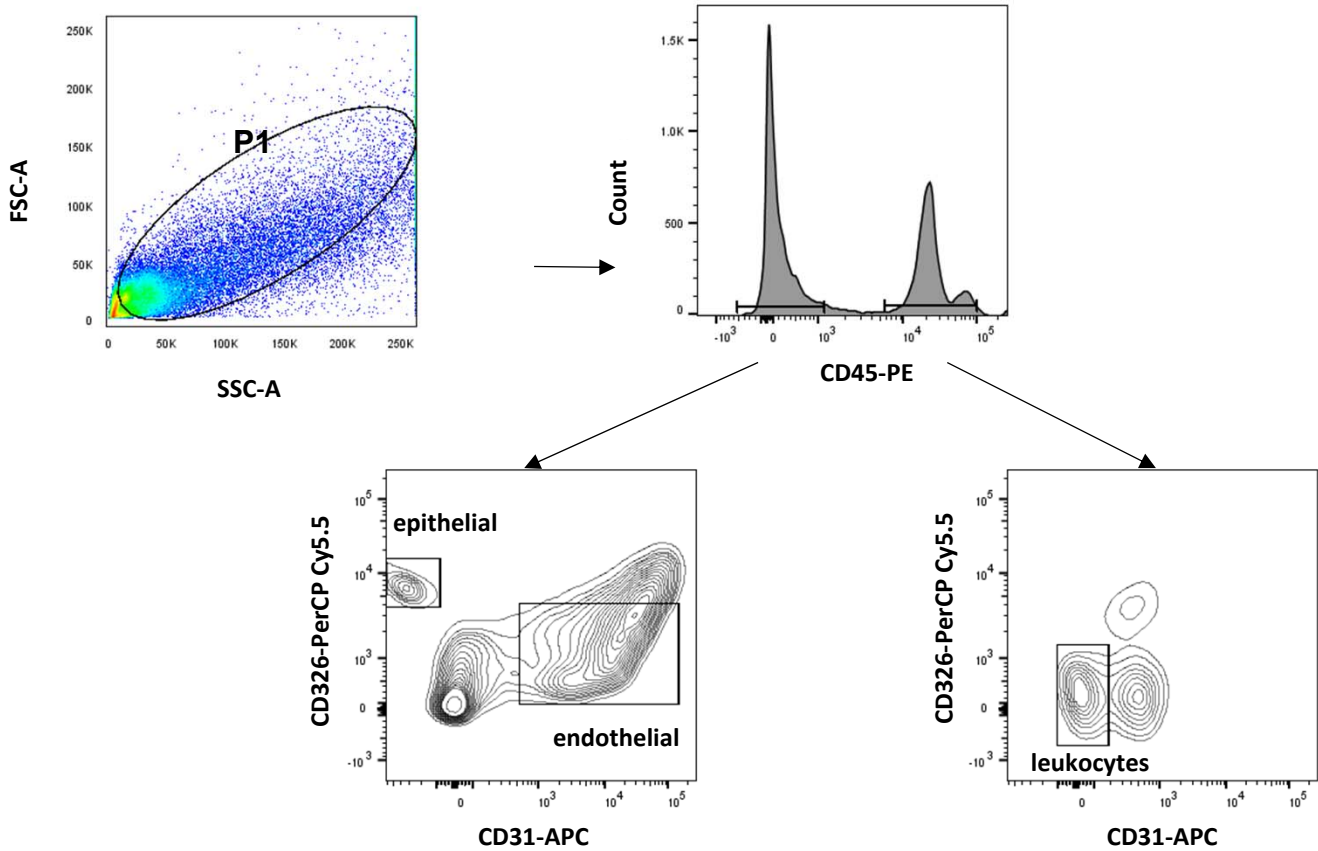

**Supplemental Fig 1.** Gating strategy to identify epithelial, endothelial, and hematopoietic lineage cells in lung digests. Forward and side scatter (FSC-A and SSC-A) gating was used to exclude debris. Among CD45 negative cells, population of CD326<sup>+</sup> and CD31<sup>+</sup> cells was identified as epithelial (CD326<sup>+</sup>CD31<sup>-</sup>CD45<sup>-</sup>) and endothelial (CD326<sup>-</sup>CD31<sup>+</sup>CD45<sup>-</sup>). Hematopoietic cells were identified as CD326<sup>-</sup>CD31<sup>-</sup>CD45<sup>+</sup> cells.
